# Supplementary material for: Aggregation-induced scaffolding: photoscissable helical polysilane generates circularly polarized luminescent polyfluorene
Source: Royal Society of Chemistry journal article supplement (doi:10.1039/c6py00595k), 2016-01-01
Supplement: c6py00595k1.pdf [file c6py00595k1.pdf]

## Electronic Supporting Information for

### Aggregation-induced scaffolding: Photocissable degradable helical polysilane generates circularly polarized luminescent polyfluorene

Nor Azura Abdul Rahim<sup>a,b</sup> and M. Fujiki<sup>a</sup>

<sup>a</sup> Graduate School of Materials Science, Nara Institute of Science and Technology (NAIST), 8916-5 Takayama, Ikoma, Nara 630-0192

<sup>b</sup> School of Materials Engineering, Universiti Malaysia Perlis (UniMAP), 02600 Arau, Perlis, Malaysia

## Contents

### 1. Experimental section

|                                                                                                   |    |
|---------------------------------------------------------------------------------------------------|----|
| 1-1. Monomer synthesis.....                                                                       | S3 |
| 1-1-1. Synthesis of <i>n</i> -hexyl-( <i>S</i> )-2-methylbutylsilanedichloride ( <b>1S</b> )..... | S3 |
| 1-1-2. Synthesis of <i>n</i> -hexyl-( <i>R</i> )-2-methylbutylsilanedichloride ( <b>1R</b> )..... | S4 |
| 1-1-3. Enantiopurity of ( <i>R</i> )- and ( <i>S</i> )-2-methylbutylchloride.....                 | S6 |
| 1-2. Polymer synthesis.....                                                                       | S7 |
| 1-2-1. Synthesis of poly( <i>n</i> -hexyl-( <i>S</i> )-2-methylbutylsilane) ( <b>PSi-S</b> )..... | S7 |
| 1-2-2. Poly( <i>n</i> -hexyl-( <i>R</i> )-2-methylbutylsilane) ( <b>PSi-R</b> ).....              | S8 |
| 1-3. Main-chain rigidity of <b>PSi-S</b> and <b>PSi-R</b> .....                                   | S9 |

### 2. Supporting Figures

|                                                                                                                                                                                                                                         |     |
|-----------------------------------------------------------------------------------------------------------------------------------------------------------------------------------------------------------------------------------------|-----|
| Figure S1. <sup>29</sup> Si-NMR spectra of <b>1S</b> in CDCl <sub>3</sub> at 30 °C.....                                                                                                                                                 | S3  |
| Figure S2. <sup>13</sup> C-NMR spectra of <b>1S</b> in CDCl <sub>3</sub> at 30 °C.....                                                                                                                                                  | S4  |
| Figure S3. <sup>29</sup> Si-NMR spectra of <b>1R</b> in CDCl <sub>3</sub> at 30 °C.....                                                                                                                                                 | S5  |
| Figure S4. <sup>13</sup> C-NMR spectra of <b>1R</b> in CDCl <sub>3</sub> at 30 °C.....                                                                                                                                                  | S6  |
| Figure S5. Chiral gas chromatograms of 2-methyl-1-butanol.....                                                                                                                                                                          | S6  |
| Figure S6. <sup>29</sup> Si-NMR spectra of <b>PSi-S</b> in CDCl <sub>3</sub> at 30 °C.....                                                                                                                                              | S7  |
| Figure S7. <sup>13</sup> C-NMR spectra of <b>PSi-S</b> in CDCl <sub>3</sub> at 30 °C.....                                                                                                                                               | S8  |
| Figure S8. <sup>29</sup> Si-NMR spectra of <b>PSi-R</b> in CDCl <sub>3</sub> at 30 °C.....                                                                                                                                              | S9  |
| Figure S9. Log[ $\eta$ ] as a function of log $M$ of <b>PSi-S</b> in toluene at 70 °C.....                                                                                                                                              | S10 |
| Figure S10. Log[ $\eta$ ] as a function of log $M$ of <b>PSi-R</b> in toluene at 70 °C.....                                                                                                                                             | S10 |
| Figure S11. $R_g$ value vs $M$ for <b>PSi-R</b> and <b>PSi-S</b> in toluene at 70 °C.....                                                                                                                                               | S11 |
| Figure S12. CPL and PL spectra of the as-prepared <b>PSi-PF8</b> hetero-aggregate.....                                                                                                                                                  | S12 |
| Figure S13. CD and UV-Vis spectra of <b>PSi-S-PF8</b> (2:1) aggregate with various amount toluene-methanol cosolvents with [PF8] = $2.5 \times 10^{-5}$ M and [PSi-S] = $5.0 \times 10^{-5}$ M as repeating units.....                  | S12 |
| Figure S14. Raw WAXD data of silicone grease, <b>PSi-S</b> , <b>PF8</b> and their <b>PSi-S-PF8</b> (2:1) aggregate from chloroform and methanol (1/1 (v/v)) and from toluene and methanol (1/1 (v/v)) embedded to silicone grease ..... | S13 |

|                                                                                                                                                                                                                                                                                                                                                                       |     |
|-----------------------------------------------------------------------------------------------------------------------------------------------------------------------------------------------------------------------------------------------------------------------------------------------------------------------------------------------------------------------|-----|
| Figure S15. Processed WAXD of <b>PSi-S</b> ( $M_n = 75,800$ ), <b>PF8</b> ( $M_n = 78,800$ ) and their <b>PSi-S-PF8</b> (2:1) aggregate from chloroform and methanol (1/1 (v/v)) subtracted with WAXD data of the silicone grease.....                                                                                                                                | S14 |
| Figure S16. Comparison of WAXD between <b>PSi-S</b> and <b>PF8</b> (2:1) aggregate from chloroform- methanol (1/1 (v/v)) and toluene–methanol (1/1 (v/v)) subtracted with WAXD of the silicone grease.....                                                                                                                                                            | S14 |
| Figure S17. Cryo-TEM images of a) <b>PF8</b> homo-aggregates, b) <b>PSi-S</b> homo-aggregates and c) <b>PSi-S</b> and <b>PF8</b> (2:1) hetero-aggregates.....                                                                                                                                                                                                         | S15 |
| Figure S18. Dynamic force mode (DFM) AFM images with SI-DF20 ( $f = 132$ KHz, $R = 15$ nm, $D = 12.5$ $\mu$ m, $C = 13$ N m <sup>-1</sup> ) on HOPG. Specimens were a) <b>PSi-S</b> aggregates, b) <b>PF8</b> aggregates and c) <b>PSi-S</b> and <b>PF8</b> (2:1) hetero-aggregates from 10 <sup>-4</sup> M in toluene-methanol (1/1 (v/v)).....                      | S15 |
| Figure S19. DFM AFM images with SI-DF20S (coated with Al, $f = 129$ KHz, $R = 2-5$ nm, $D = 12.5$ $\mu$ m, $C = 12$ N m <sup>-1</sup> ) on HOPG casting from 10 <sup>-5</sup> M chloroform solution of <b>PSi-S</b> ( $M_n = 75,800$ ).....                                                                                                                           | S16 |
| Figure S20. DFM AFM images with SI-DF20S on HOPG from 10 <sup>-5</sup> M in 2% methanol and 98 % chloroform of <b>PSi-S</b> ( $M_n = 75,800$ ).....                                                                                                                                                                                                                   | S17 |
| Figure S21. DFM AFM images with SI-DF20S on HOPG from 10 <sup>-5</sup> M in 5% methanol and 95% chloroform solution of <b>PSi-S</b> ( $M_n = 75,800$ ).....                                                                                                                                                                                                           | S18 |
| Figure S22. DFM AFM images with SI-DF20S on HOPG casting from 10 <sup>-5</sup> M chloroform solution of <b>PF8</b> ( $M_n = 78,400$ ).....                                                                                                                                                                                                                            | S19 |
| Figure S23. DFM AFM images with SI-DF20S on HOPG casting from <b>PSi-S</b> and <b>PF8</b> (2:1) from 10 <sup>-5</sup> M solution of 5% methanol and 95% CHCl <sub>3</sub> .....                                                                                                                                                                                       | S20 |
| Figure S24. Speculated cross-section of <b>PSi-S</b> and <b>PF8</b> (2:1) hetero-aggregate to explain height profile in Fig. S23. Red lines are possible attractive C-H/H-C interactions. Diameter $\approx 5$ nm is two <b>PSi-S</b> chains with one <b>PF8</b> chain, while diameter $\approx 6$ nm is from two <b>PSi-S</b> chains with two <b>PF8</b> chains..... | S21 |
| Figure S25. CD and UV-Vis spectra of hetero-aggregates under photochemical decomposition of <b>PSi-S</b> and <b>PF8</b> (= 2/1) produced in a toluene-methanol cosolvent (1/1 (v/v)) with $[\text{PF8}] = 2.5 \times 10^{-5}$ M and $[\text{PSi-S}] = 5.0 \times 10^{-5}$ M. The $M_w$ s of <b>PSi-S</b> and <b>PF8</b> were 40,500 and 78,400.....                   | S22 |
| Figure S25. CD and UV-Vis spectra of hetero-aggregates under photochemical decomposition of <b>PSi-S</b> and <b>PF8</b> (= 2/1) produced in a toluene-methanol cosolvent (1/1 (v/v)) with $[\text{PF8}] = 2.5 \times 10^{-5}$ M and $[\text{PSi-S}] = 5.0 \times 10^{-5}$ M. The $M_w$ s of <b>PSi-S</b> and <b>PF8</b> were 40,500 and 78,400.....                   | S22 |
| <b>3. References.....</b>                                                                                                                                                                                                                                                                                                                                             | S23 |

## 1. Experimental section

### 1-1. Monomer synthesis

In an analogous method reported previously<sup>[S1]</sup>, *n*-hexyl-(*S*)-2-methylbutylsilanedichloride and *n*-hexyl-(*R*)-2-methylbutylsilanedichloride were prepared.

#### 1-1-1. Synthesis of *n*-hexyl-(*S*)-2 methylbutylsilanedichloride (1S)

A fresh Grignard reagent (i.e., (*S*)-2-methylbutylmagnesium chloride) was prepared from 5.0 g (0.217 mol) of Mg turnings (Wako Chemicals (Osaka, Japan)) and (*S*)-2-methylbutylchloride (Tokyo Chemical Industry (TCI), Tokyo, Japan) ( $[\alpha]^{24}_{\text{D}} = 1.44^\circ$  (neat)). First, Mg and 100 mL of dry THF (Kanto Chemicals (Tokyo, Japan)) were placed in a three-neck flask under pure N<sub>2</sub> gas and the Mg surface was activated by the addition of a few drops of 1,2-dibromoethane (Wako). To this solution, 14.8 g (0.138 mol) of (*S*)-2-methylbutylchloride was added dropwise for 30 min, and the mixture was maintained at 50 °C for 30 min. A coloured solution containing the Grignard reagent was obtained. To a mixture of 51.7 g (0.235 mol) of *n*-hexyltrichlorosilane (Shin-Etsu Chemical (Tokyo, Japan)) and 50 mL of THF at 55–60 °C in another three-neck flask, the Grignard solution was added dropwise for 2.5 h and maintained at 50 °C for 2 h. The crude monomer was purified by vacuum distillation (bp 79–82 °C/ 0.85 Torr). Yield: 23.3 g (46.6 %).  $[\alpha]^{24}_{\text{D}} = 9.31^\circ$  (neat). <sup>29</sup>Si-NMR (CDCl<sub>3</sub>, 30 °C, ppm) 33.185, <sup>13</sup>C-NMR (CDCl<sub>3</sub>, 30 °C, ppm) 32.393, 32.180, 31.358, 30.284, 28.174, 22.500, 22.447, 21.865, 21.373, 14.055, 11.211.

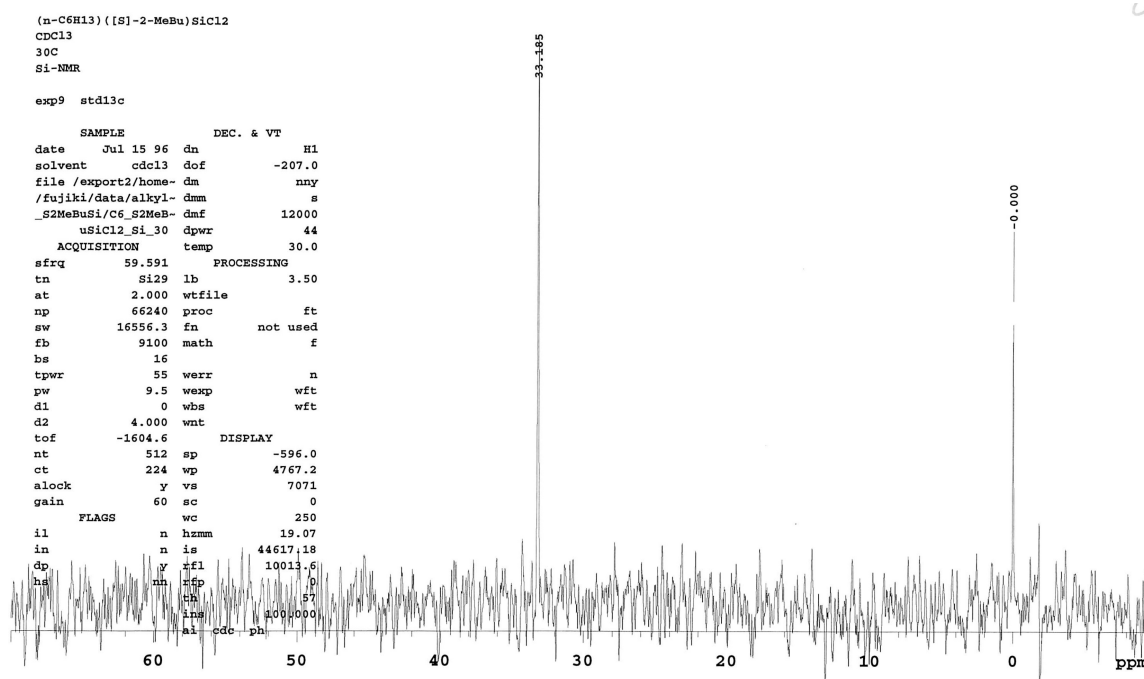

**Fig. S1.** <sup>29</sup>Si-NMR spectra of **1S** in CDCl<sub>3</sub> at 30 °C. <sup>29</sup>Si resonances at 33.185 ppm using the Me<sub>4</sub>Si <sup>29</sup>Si reference peak (0.000 ppm).

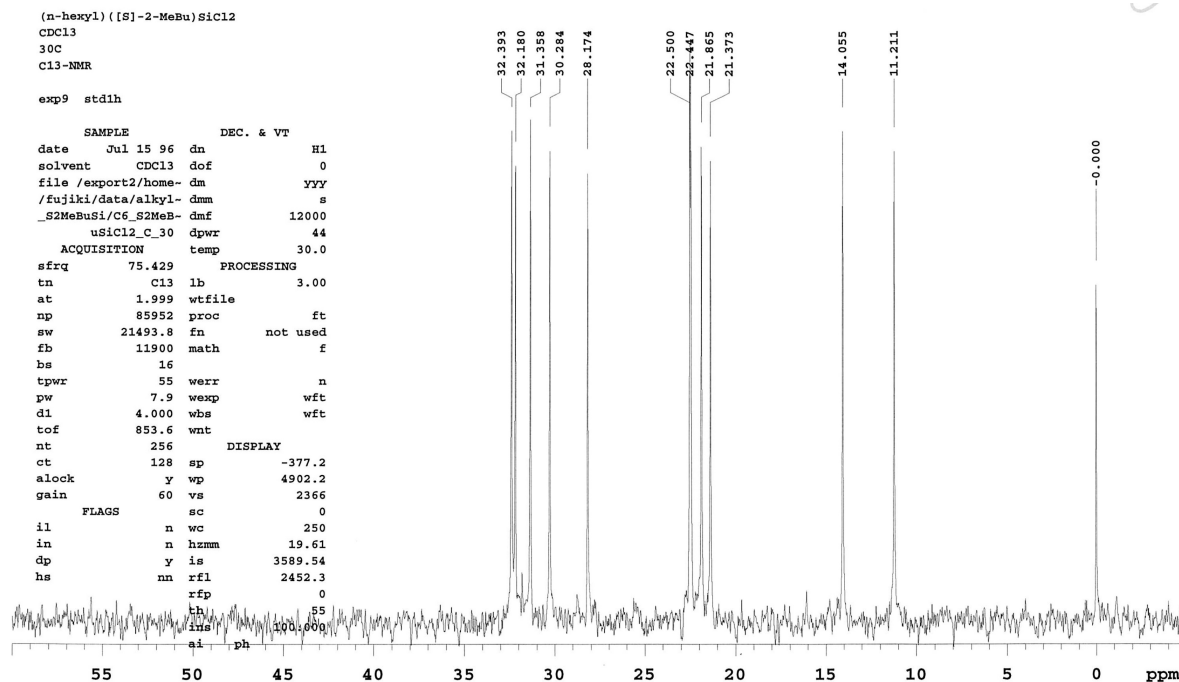

**Fig. S2.** <sup>13</sup>C-NMR spectra of **1S** in CDCl<sub>3</sub> at 30 °C. <sup>13</sup>C resonances at 32.393, 32.180, 31.358, 30.284, 28.174, 22.500, 22.447, 21.865, 21.373, 14.055, 11.211 ppm vs Me<sub>4</sub>Si <sup>13</sup>C reference peak (0.000 ppm).

### 1-1-2. Synthesis of *n*-hexyl-(*R*)-2-methylbutylsilanedichloride (**1R**)

Similarly, a fresh Grignard reagent of (*R*)-2-methylbutylmagnesium chloride was prepared from 2.7 g (0.217 mol) of Mg turnings (Wako) and (*R*)-2-methylbutylchloride (custom made by Chemical Soft Research Co., Kyoto, Japan) ( $[\alpha]_D^{24} = -1.26^\circ$  (neat)). First, Mg and 75 mL of dry THF (Kanto Chemicals) were placed in a three-neck flask under pure N<sub>2</sub> gas and the Mg surface was activated by the addition of a few drops of 1,2-dibromoethane. To this solution, 10.6 g (0.10 mol) of (*R*)-2-methylbutylchloride was added dropwise for 30 min, and the mixture was maintained at 50 °C for 30 min. A coloured Grignard reagent solution was obtained. To a mixture of *n*-hexyltrichlorosilane (Shin-Etsu Chemical, 60.0 g (0.27 mol)) and THF (150 mL) at 55–60 °C in another three-neck flask, the Grignard solution was added dropwise for 2 h and maintained at 50 °C for 2 h. The crude monomer was purified by vacuum distillation (bp 116–119 °C/ 6 Torr). Yield: 15.0 g (58.8 %).  $[\alpha]_D^{24} = -9.27^\circ$  (neat). <sup>29</sup>Si-NMR (CDCl<sub>3</sub>, 30 °C, ppm) 33.229, <sup>13</sup>C-NMR (CDCl<sub>3</sub>, 30 °C, ppm) 32.370, 32.170, 31.335, 30.248, 28.109, 22.491, 22.421, 21.847, 21.334, 14.072, 11.228.



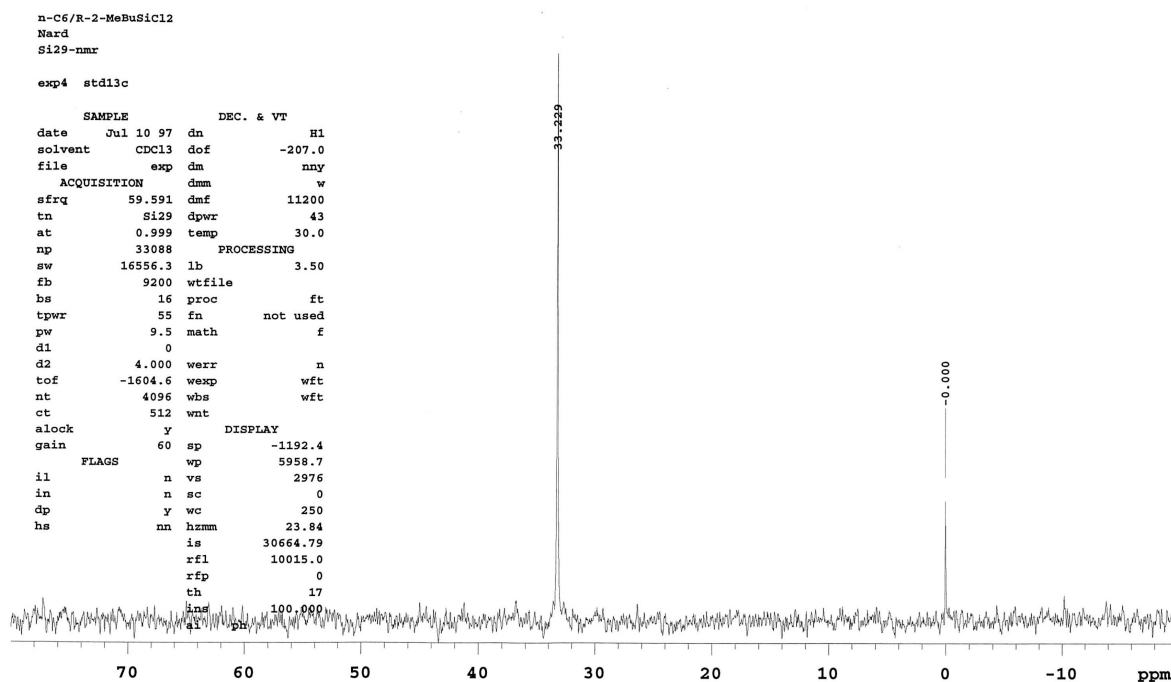

**Fig. S3.**  $^{29}\text{Si}$ -NMR spectra of **1R** in  $\text{CDCl}_3$  at 30 °C.  $^{29}\text{Si}$  resonances at 33.229 ppm using the  $\text{Me}_4\text{Si}$   $^{29}\text{Si}$  reference peak (0.000 ppm).

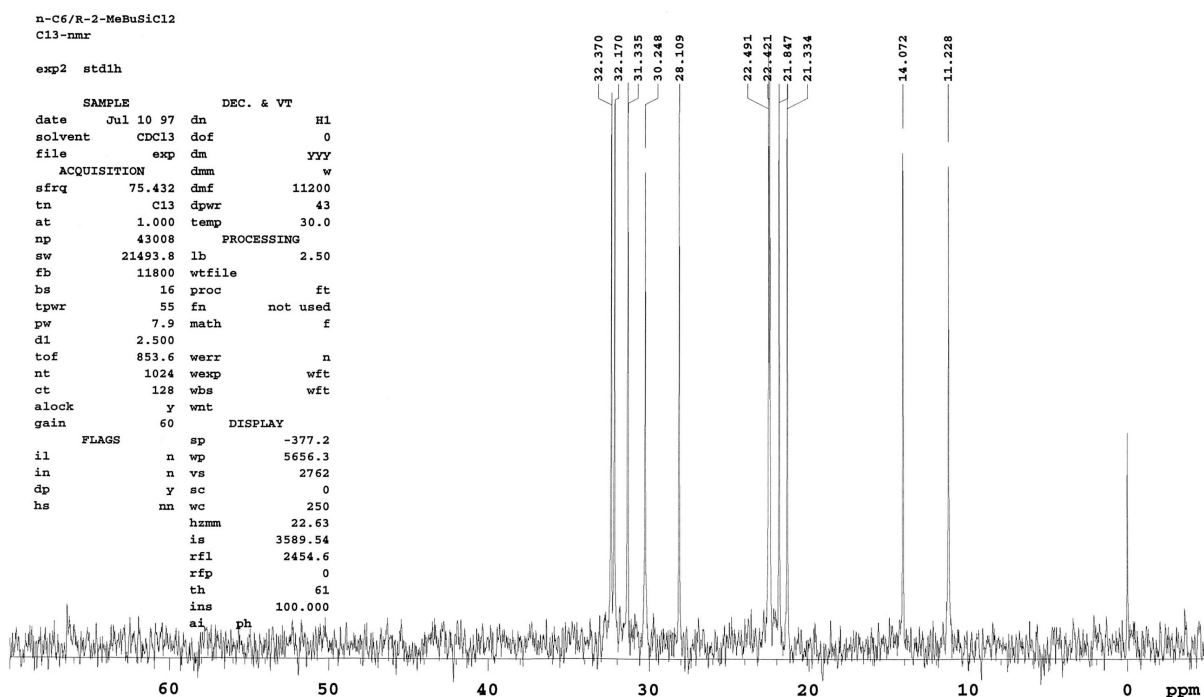

**Fig. S4.**  $^{13}\text{C}$ -NMR spectra of **1R** in  $\text{CDCl}_3$  at 30 °C.  $^{13}\text{C}$  resonances at 32.370, 32.170, 31.335, 30.248, 28.109, 22.491, 22.421, 21.847, 21.334, 14.072, 11.228 ppm vs  $\text{Me}_4\text{Si}$   $^{13}\text{C}$  reference peak (0.000 ppm).

### 1-1-3. Enantiopurity of (*R*)-2-methylbutylchloride and (*S*)-2-methylbutylchloride

Because (*R*)-2-methylbutylchloride was not available from a naturally occurring substance, Chemical Soft Research Co. synthesized this compound by another route in a nearly ten-step procedure based on the advice from Dr. Akira Tai (Emeritus Prof., University of Hyogo, Japan). Although an enantiopurity (*ee*) check of (*R*)-2-methylbutylchloride and (*S*)-2-methylbutylchloride using several chiral GC columns at the Toray Research Center (TRC) was unsuccessful, these starting chiral alcohols (i.e., (*R*)-2-methyl-1-butanol and (*S*)-2-methyl-1-butanol) as well as their racemic mixture were successfully analysed by  $\beta$ -DEX325 (30 m  $\times$  0.25 mm ID, Spelco) at the TRC. The enantiopurities of (*R*)-2-methyl-1-butanol and (*S*)-2-methyl-1-butanol were 99.5 % *ee* and 100 % *ee*, respectively.

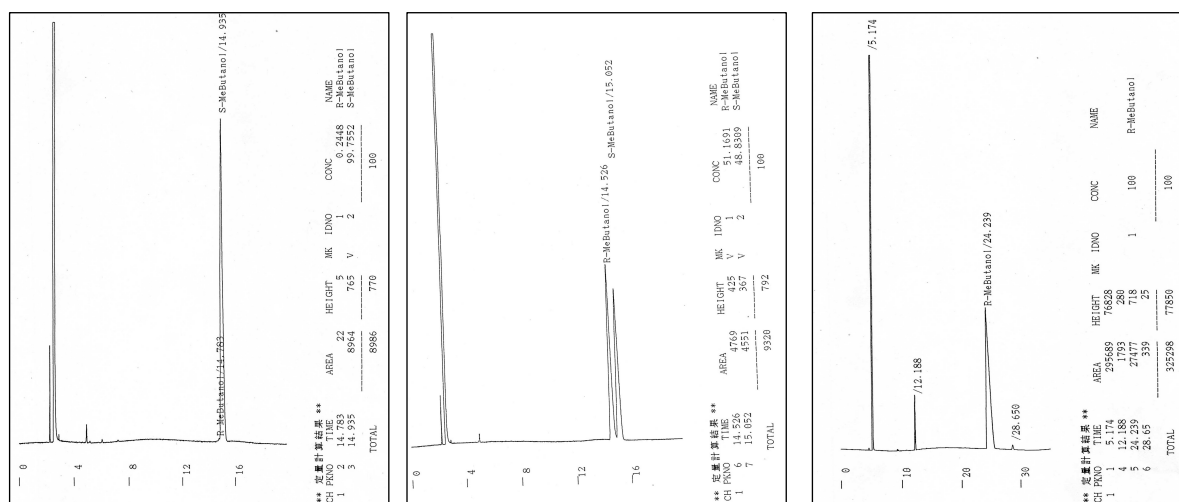

**Fig. S5.** Gas chromatograms of 2-methyl-1-butanol using a chiral GC technique (HP5890A, He carrier (1.2 mL min<sup>-1</sup>),  $\beta$ -DEX325 (30 m  $\times$  0.25 mm ID) at 55 and 50 °C, Spelco). (Left) (*S*)-2-methyl-1-butanol (TCI, Tokyo, Japan) with (*R*)-2-methyl-1-butanol (retention time (*r.t.*) 14.783 min) / (*S*)-2-methyl-1-butanol (*r.t.* 14.935 min) = 0.24/99.76 (%/%). (Centre) A racemic mixture of 2-methyl-1-butanol (TCI, Tokyo, Japan) with (*R*)-2-methyl-1-butanol (*r.t.* 15.052 min) / (*S*)-2-methyl-1-butanol (*r.t.* 14.526 min) = 51.17/48.83 (%/%). (Right) (*R*)-2-methyl-1-butanol (custom made by Chemical Soft Research Co., Kyoto, Japan) with (*R*)-2-methyl-1-butanol (retention time = 24.239 min) = 100.00 (%). No detection of (*S*)-2-methyl-1-butanol. The Toray Research Center (TRC, Shiga, Japan) and Nippon Telegraph and Telephone Corporation (NTT) R&D center (Atsugi-Kanagawa, Japan) [report no. T217601 and T217118] measured and analysed the samples.

## 1-2. Polymer synthesis

A pair of unfractionated rigid rod-like helical **PSi-S** and **PSi-R** was prepared according to a previously reported protocol.

### 1-2-1. Poly(*n*-hexyl-(*S*)-2-methylbutylsilane) (**PSi-S**)

To a mixture containing 50 mL of dry toluene (Wako), 1.0 g (43 mmol) of sodium (Wako), and 0.05 g (0.19 mmol) of 18-crown-6 (Wako) at 120 °C, 5.1 g (20 mmol) of **1S** were added dropwise under an N<sub>2</sub> atmosphere. The mixture was slowly stirred at 120 °C for 2 h. The reaction mixture became highly viscous. Additionally, 500 mL of dry toluene was added to reduce the solution viscosity and the resulting mixture was stirred overnight. The hot reaction slurry was passed immediately through 40  $\mu$ m and 2- $\mu$ m PTFE filters (Fluoropore F-40 and Fp-200, Sumitomo Electric Co. (Tokyo, Japan)) using the pressure of N<sub>2</sub> gas. To the clear filtrate, ethanol and methanol were carefully added. White precipitates were collected by centrifugation with a Kubota model 5420 centrifuge at 3000 rpm (Kubota Corporation (Tokyo, Japan)) followed by drying overnight at 120 °C under vacuum. The masses of the first (higher-*M<sub>w</sub>*) and second (middle-*M<sub>w</sub>*) fractions were 0.16 g (4.3%) and 0.50 g (13.6%), respectively. In addition, several fractionations from the second fraction were made on the basis of the choice of toluene and poor solvents (IPA, ethanol, methanol and water). For the second fraction, <sup>29</sup>Si NMR (CDCl<sub>3</sub>, 30 °C, ppm) exhibited peaks at –22.2, –22.4 and –23.0, and <sup>13</sup>C NMR (CDCl<sub>3</sub>, 30 °C, ppm) exhibited peaks at 34.1, 31.4 and 23.0.

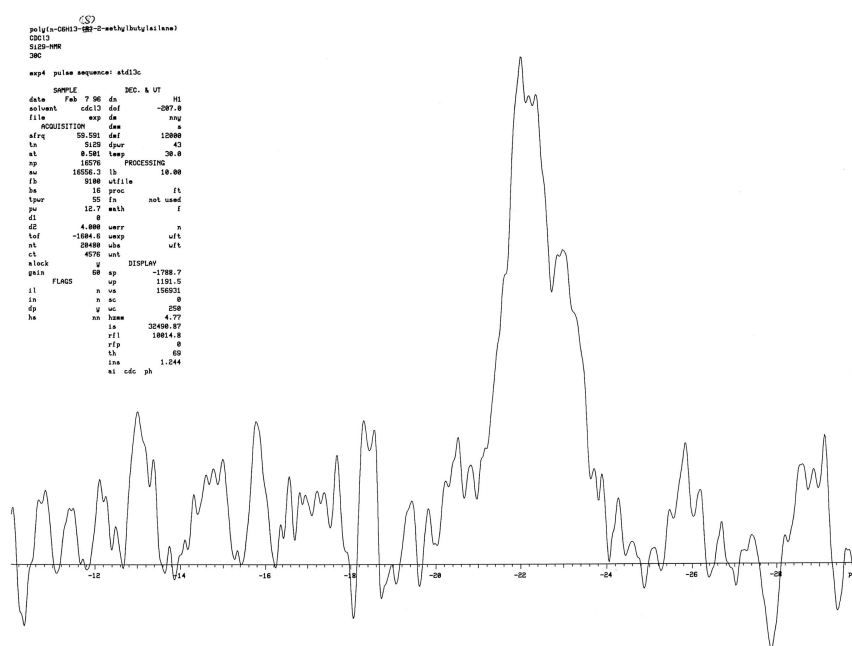

**Fig. S6.** <sup>29</sup>Si-NMR spectra of **PSi-S** in CDCl<sub>3</sub> at 30 °C. <sup>29</sup>Si NMR signals exhibit broad resonances at –22.0, –22.2 and –22.7 ppm relative to the Me<sub>4</sub>Si <sup>29</sup>Si reference peak (0.000 ppm).

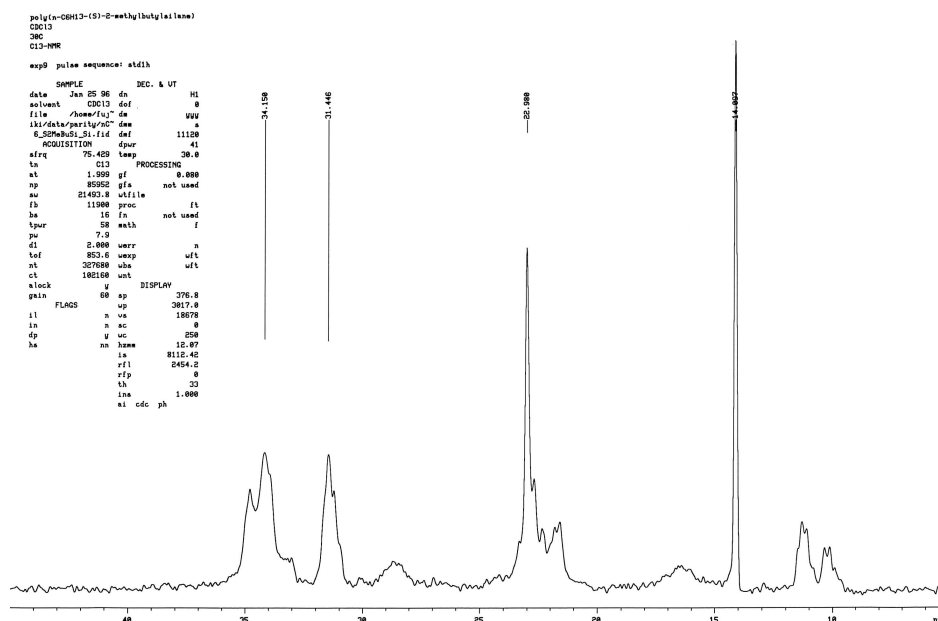

**Fig. S7.**  $^{13}\text{C}$ -NMR spectra of **PSi-S** in  $\text{CDCl}_3$  at 30 °C.  $^{13}\text{C}$  NMR signals exhibit broad resonances at 34.1, 31.4 and 23.0 ppm relative to the  $\text{Me}_4\text{Si}$   $^{29}\text{Si}$  reference peak (0.000 ppm).

### 1-2-2. Poly(*n*-hexyl-*R*)-2-methylbutylsilane) (**PSi-R**)

Similarly, to a mixture of 25 mL of dry toluene (Wako), 0.80 g (35 mmol) of sodium (Wako) and 0.03 g (0.11 mmol) of 18-crown-6 (Wako) at 120 °C, 2.55 g (10 mmol) of **1R** was added dropwise under an  $\text{N}_2$  atmosphere. The mixture was stirred at 120 °C for 2 h. The reaction mixture became highly viscous. Additionally, 500 mL of dry toluene were added to reduce the solution viscosity followed by stirring overnight. The hot reaction slurry was passed immediately through 40  $\mu\text{m}$  and 2- $\mu\text{m}$  PTFE filters (Fluoropore F-40 and Fp-200, Sumitomo Electric Co.) using the pressure of the  $\text{N}_2$  gas flow. To the clear filtrate, ethanol and methanol were carefully added. The white precipitates were collected by centrifugation using a Kubota 5420 at 3000 rpm and were subsequently dried overnight at 120 °C under vacuum. The masses of the first (higher- $M_w$ ) and second (middle- $M_w$ ) fractions were 0.17 g (9.2 %) and 0.37 g (20.1 %), respectively. Further fractionations from the second fraction were conducted on the basis of the choice of toluene and poor solvents (IPA, ethanol, methanol and water). Three broad  $^{29}\text{Si}$  NMR resonance peaks were observed for the second fraction (100 MHz,  $\text{CDCl}_3$ ) at  $-22.0$ ,  $-22.2$  and  $-22.7$ . For the second fraction, the  $^{29}\text{Si}$  NMR spectrum ( $\text{CDCl}_3$ , 30 °C, ppm) contained peaks at  $-22.0$ ,  $-22.2$  and  $-22.7$ .

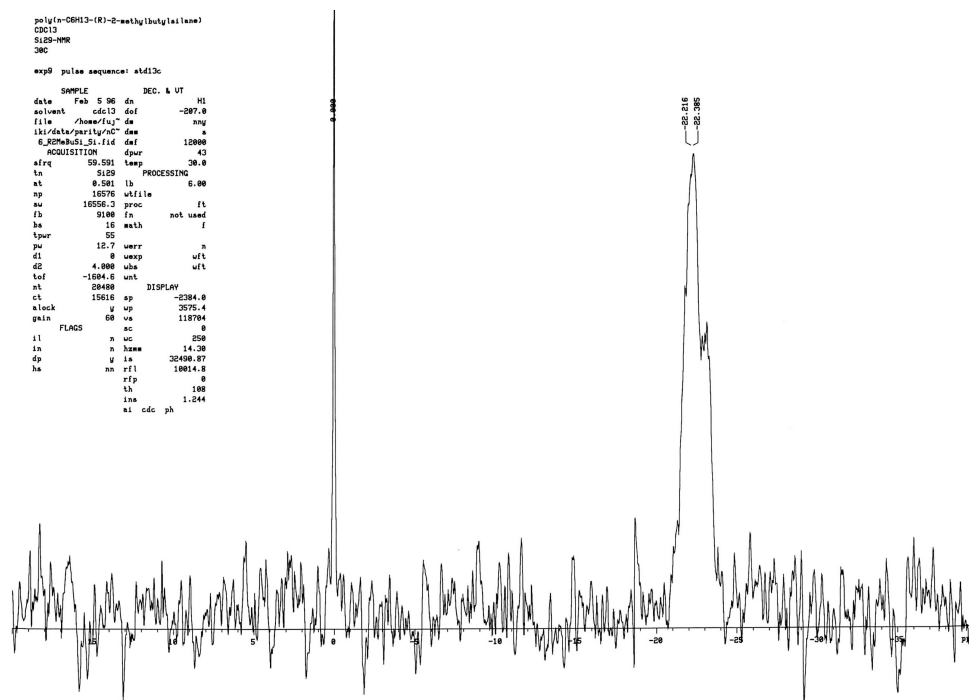

**Fig. S8.**  $^{29}\text{Si}$ -NMR spectra of **PSi-R** in  $\text{CDCl}_3$  at 30 °C.  $^{29}\text{Si}$  NMR signals exhibited broad resonances at  $-22.2$ ,  $-22.4$ , and  $-23.0$  ppm relative to the  $\text{Me}_4\text{Si}$   $^{29}\text{Si}$  reference peak (0.000 ppm).

### 1-3. Chain rigidity of **PSi-S** and **PSi-R**

The degree of polysilane stiffness was confirmed by the high viscosity index observed in the viscometric data ( $\alpha$ ) in the Kuhn-Mark-Houwink-Sakurada plots ( $[\eta] = \kappa \cdot M^\alpha$ , where  $[\eta]$  is the intrinsic viscosity,  $M$  is the molecular mass,  $\kappa$  is a constant, and  $\alpha$  is the viscosity index) in toluene at 70 °C. The viscometric measurement has been well established as a physico-chemical method for the characterisation of floppy chain-like polymers in dilute solution. The  $\alpha$  values of **PSi-S** and **PSi-R** were 1.24 and 1.52, respectively.

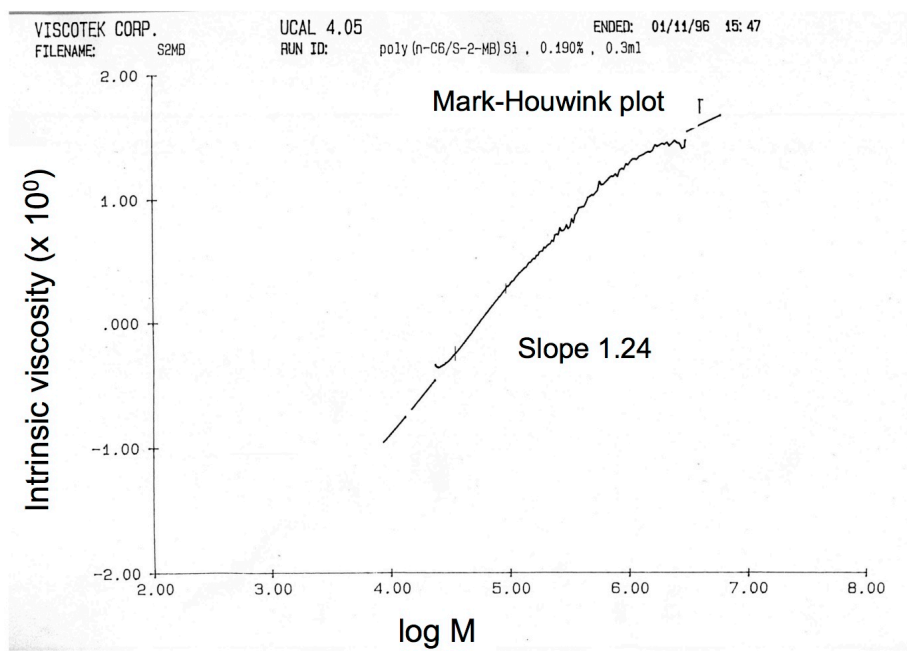

**Fig. S9.** Raw data of  $\log[\eta]$  as a function of  $\log M$  for **PSi-S** in toluene at 70 °C using a Waters model 150C GPC system (three GMH<sub>XL</sub> columns (30 cm × 8 mm ID, Tosoh (Tokyo, Japan) equipped with a Viscotek H502a detector) at a flow rate of 0.97 mL min<sup>-1</sup>. The TRC and NTT R&D centre measured and analysed the samples (file no. TRC-T111433).

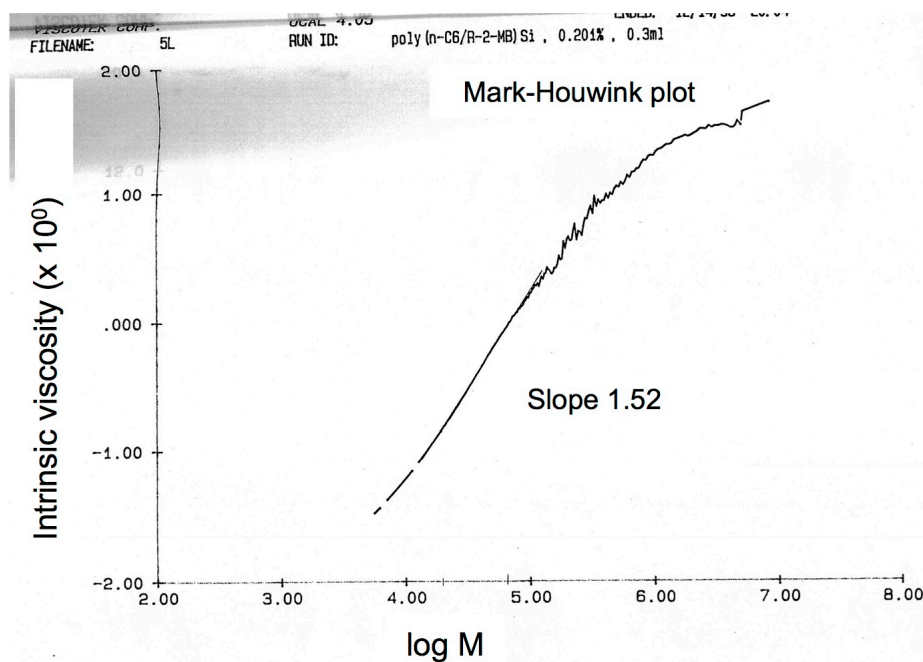

**Fig. S10.** Raw data of  $\log[\eta]$  as a function of  $\log M$  for **PSi-R** in toluene at 70 °C using a Waters model 150C GPC system (three GMH<sub>XL</sub> columns (30 cm × 8 mm ID, Tosoh (Tokyo, Japan) equipped with a Viscotek H502a detector) at a flow rate of 0.97 mL min<sup>-1</sup>. The TRC and NTT R&D centre measured and analysed the samples (file no. TRC-T111093).

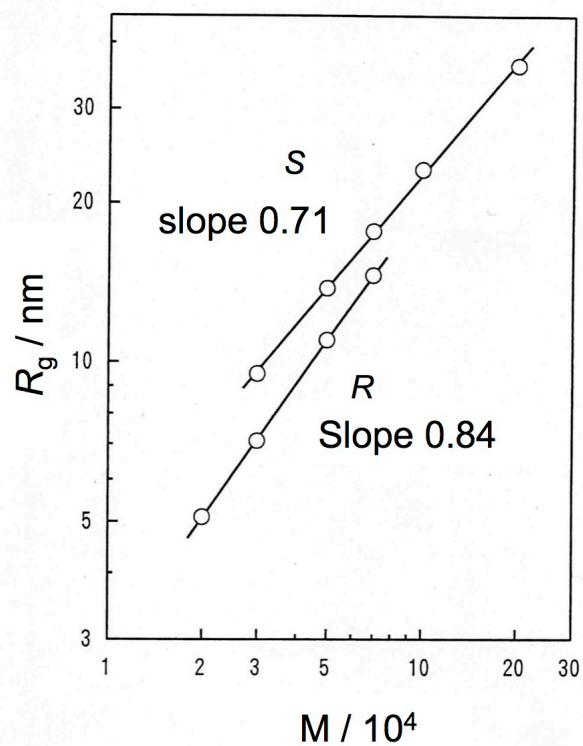

**Fig. S11.**  $R_g$  value as a function of  $M$  for **PSi-R** and **PSi-S** in toluene at 70 °C. The analysis was performed by the TRC, file no. TRC-T111433 T111433/ T111093.

## 2. Supporting Figures

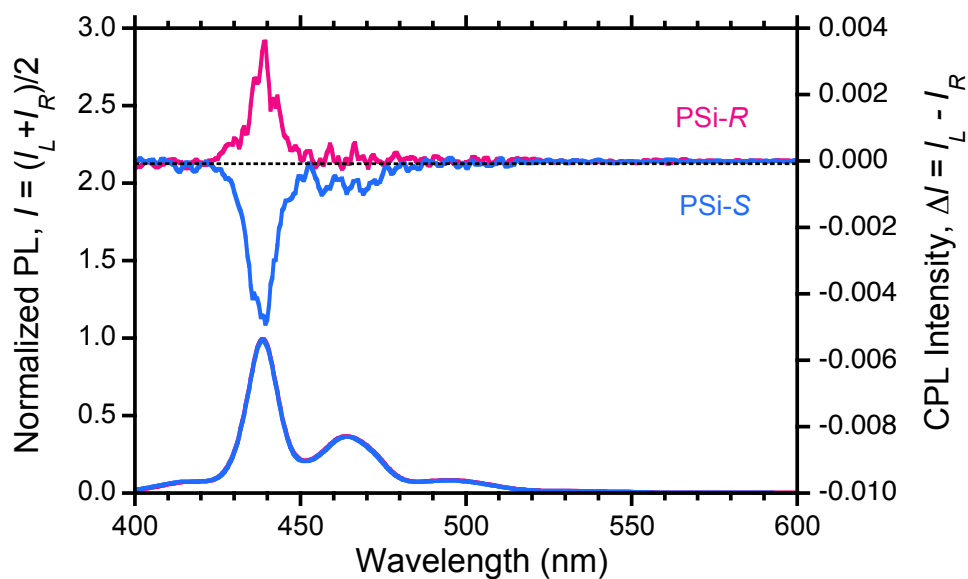

**Fig. S12.** CPL and PL spectra of the as-prepared **PSi** and **PF8** (= 2:1 ratio) hetero-aggregate in toluene-methanol (1.5/1.5 (v/v)).

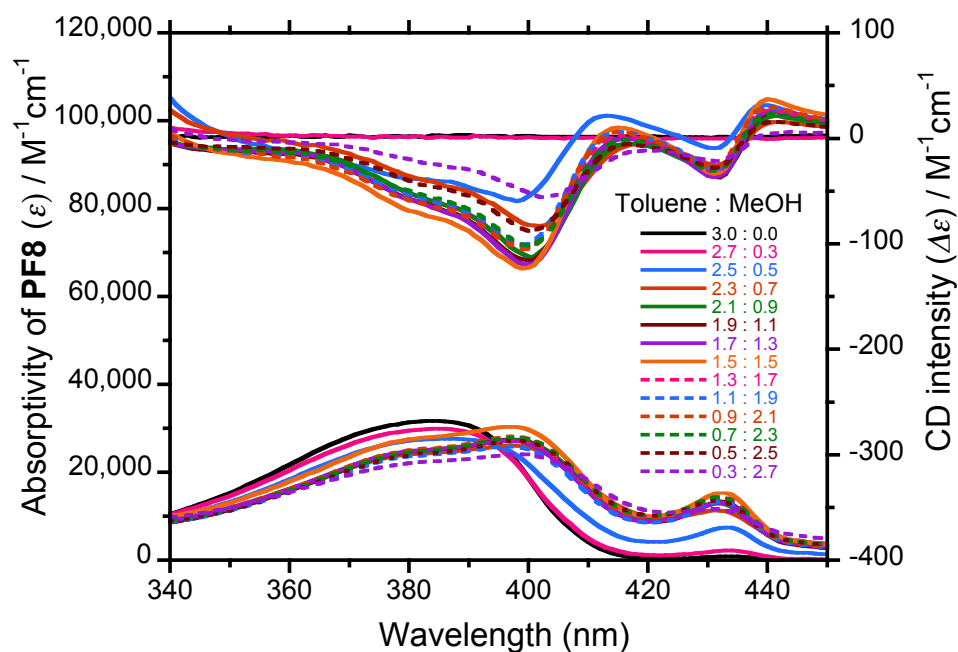

**Fig. S13.** CD and UV-Vis spectra of hetero-aggregates of **PSi-S** and **PF8** with various amount toluene-methanol cosolvent (v/v) with  $[\text{PF8}] = 2.5 \times 10^{-5} \text{ M}$  and  $[\text{PSi-S}] = 5.0 \times 10^{-5} \text{ M}$  as their repeating units. The  $M_w$  values of **PSi-S** and **PF8** were 75,800 and 78,800, respectively.



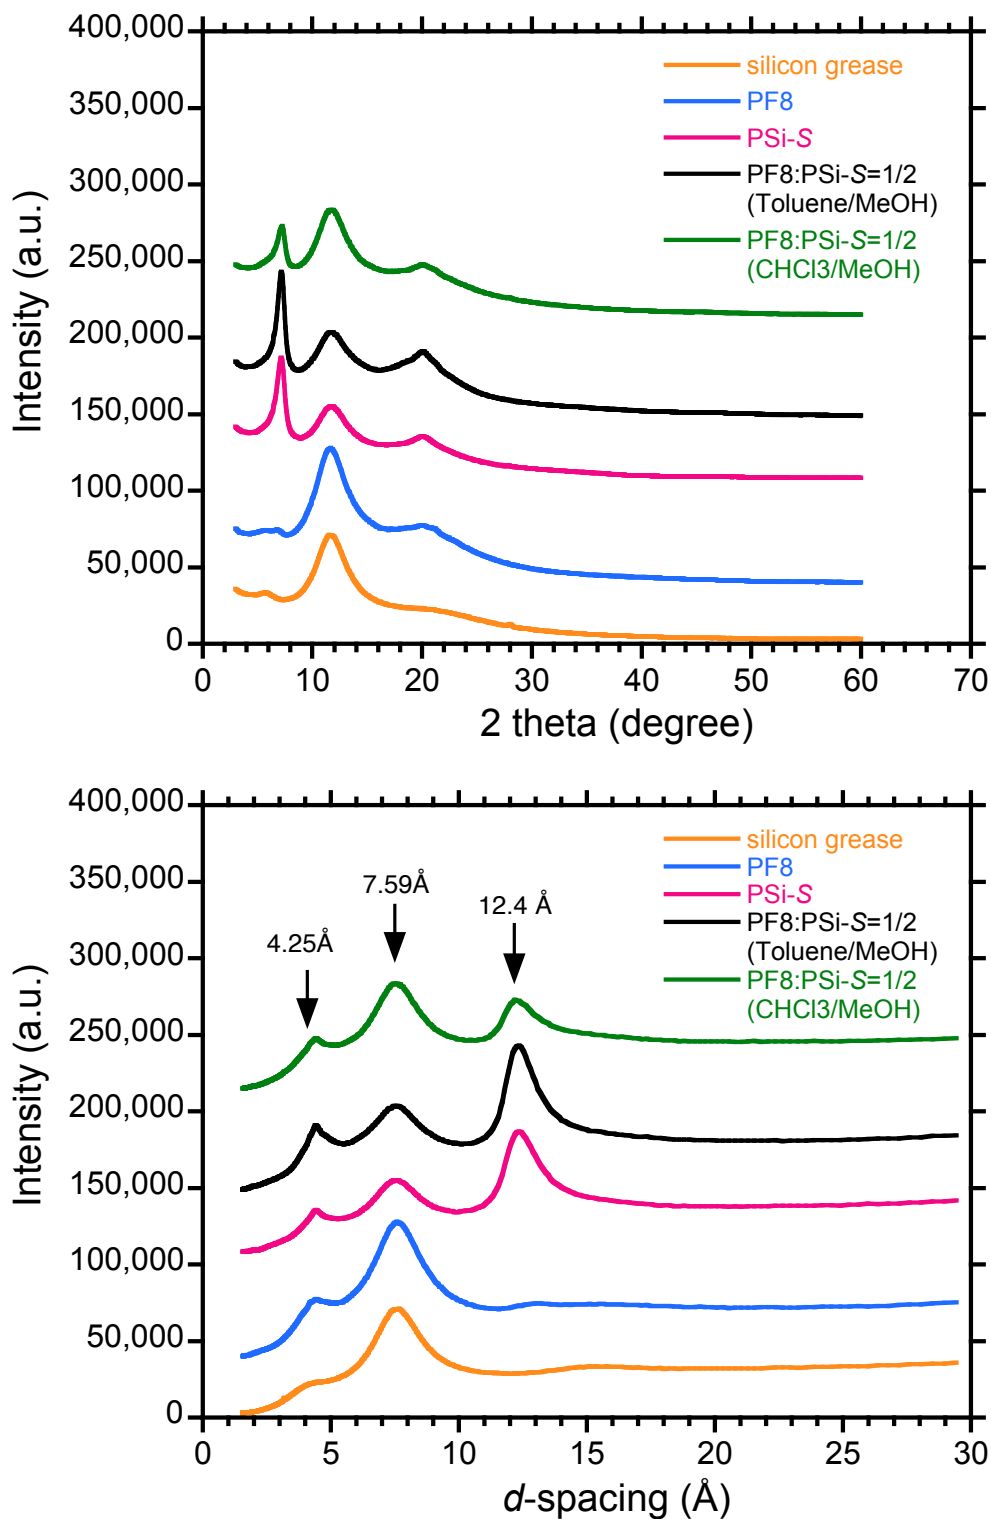

**Fig. S14.** WAXD data of high-vacuum silicone grease (Dow-Corning-Toray), **PF8** ( $M_n = 78,800$ ), **PSi-S** ( $M_n = 75,800$ ) and their **PSi-S-PF8** (= 2:1) aggregate from chloroform and methanol (1/1 (v/v)) and from toluene and methanol (1/1 (v/v)) embedded to silicone grease onto an Si-crystal substrate as functions of (top) diffraction angle ( $2\theta$ ) and (bottom)  $d$ -spacing.

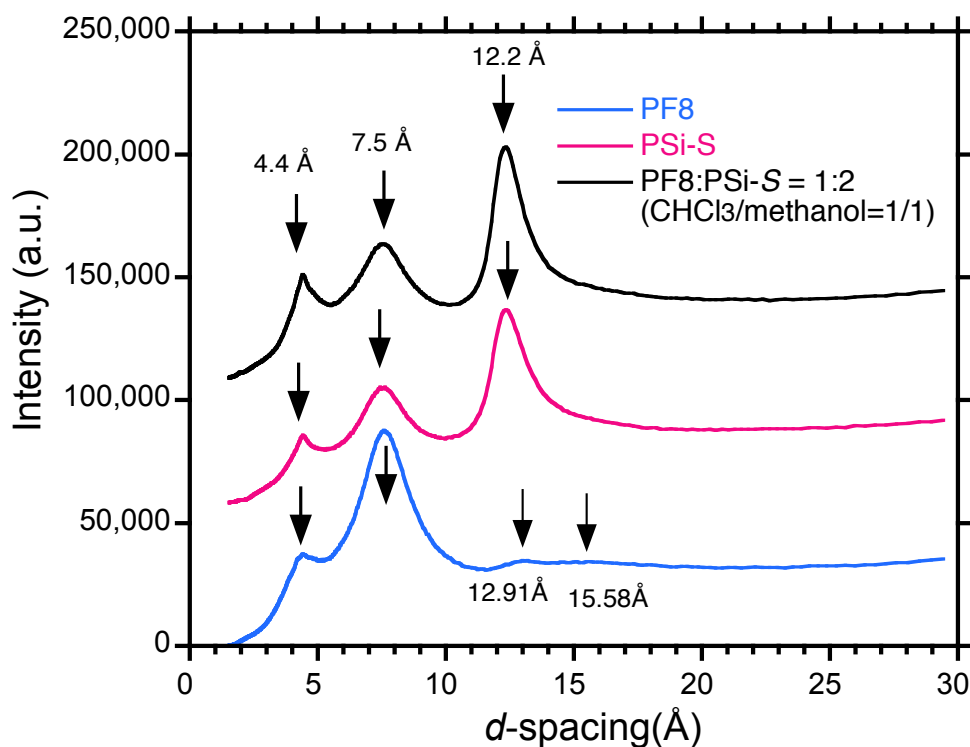

**Fig. S15.** WAXD of **PF8** ( $M_n = 78,800$ ), **PSi-S** ( $M_n = 75,800$ ) and **PSi-S-PF8** (= 2:1) aggregate from chloroform and methanol (1/1 (v/v)) subtracted with WAXD data of the silicone grease.

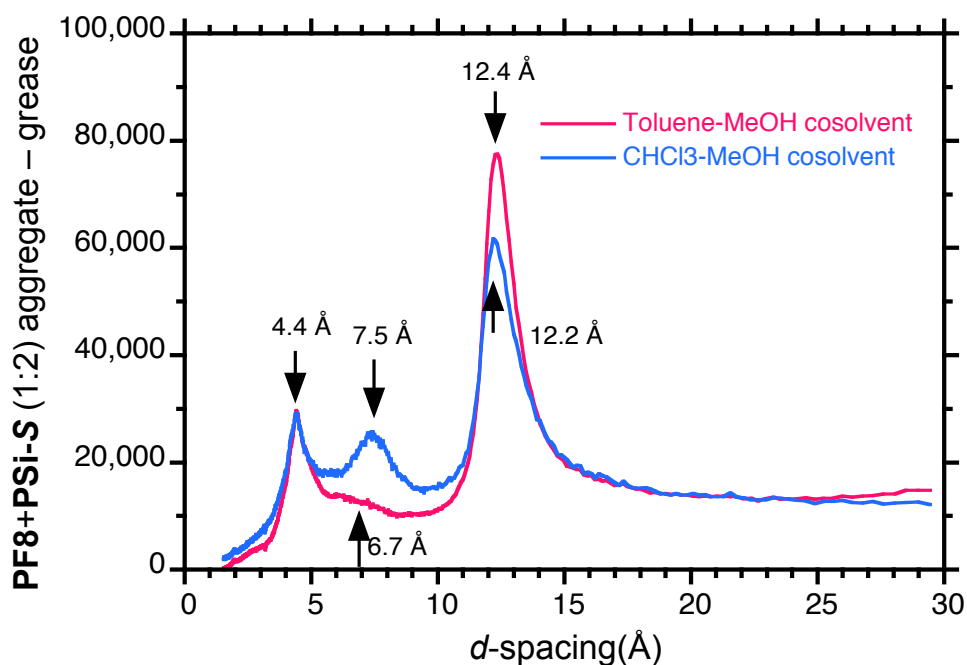

**Fig. S16.** Comparison of WAXD between **PSi-S-PF8** (= 2:1) aggregates from chloroform and methanol (1/1 (v/v)) and from toluene and methanol (1/1 (v/v)) subtracted with WAXD data of the silicone grease.

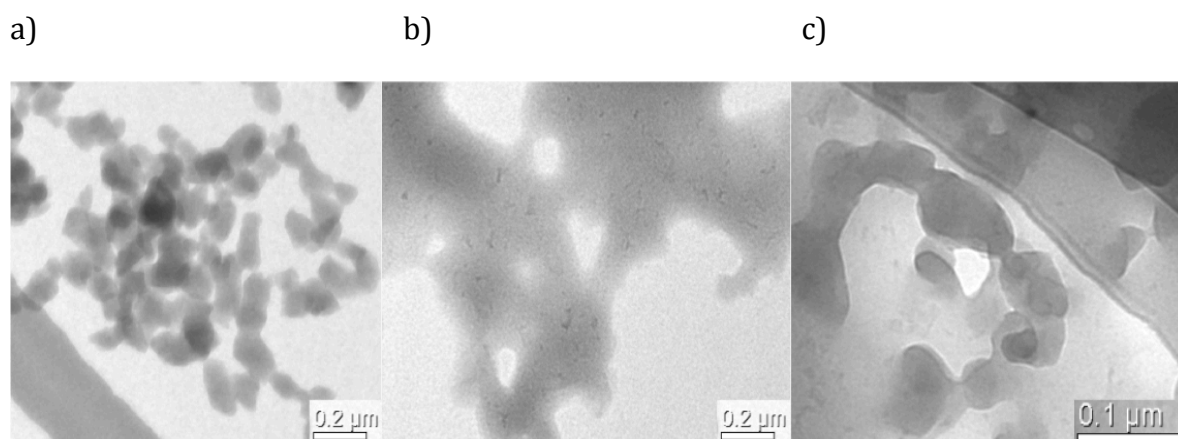

**Fig. S17.** Cryo-TEM images on carbon-coated copper grid (200 mesh) of a) **PF8** homo-aggregates, b) **PSi-S** homo-aggregates and c) **PSi-S-PF8** (= 2:1) hetero-aggregates.

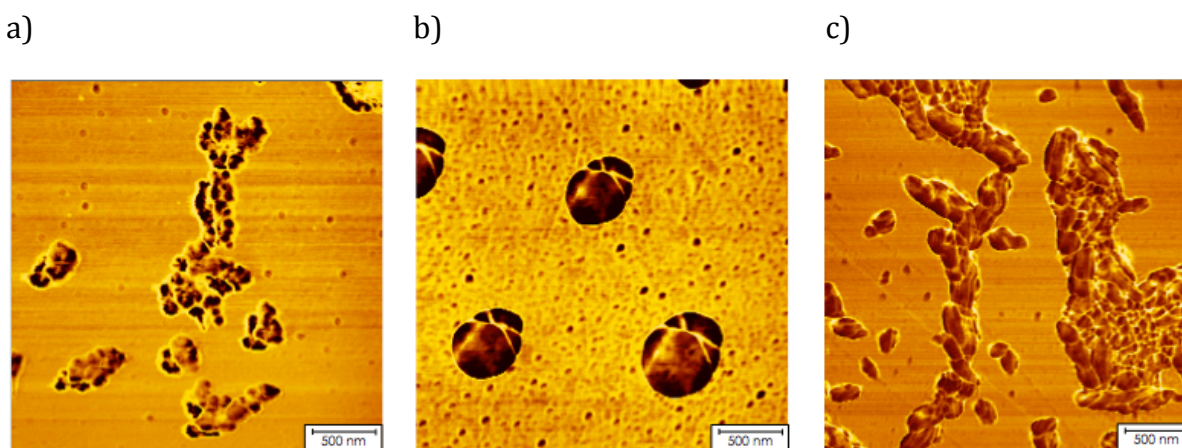

**Fig. S18.** Dynamic force mode (DFM) AFM images with SI-DF20 ( $f = 132$  KHz,  $R = 15$  nm,  $D = 12.5$   $\mu\text{m}$ ,  $C = 13$  N m $^{-1}$ ) on HOPG. Specimens were a) **PSi-S** homo-aggregates, b) **PF8** homo-aggregates and c) **PSi-S-PF8** (= 2:1) hetero-aggregates. All specimens were produced by a drop-cast of  $10^{-4}$  M aggregates suspension in toluene-methanol (1/1 (v/v)) cosolvent.

**PSi-S from  $10^{-5}$  M  $\text{CHCl}_3$  solution**

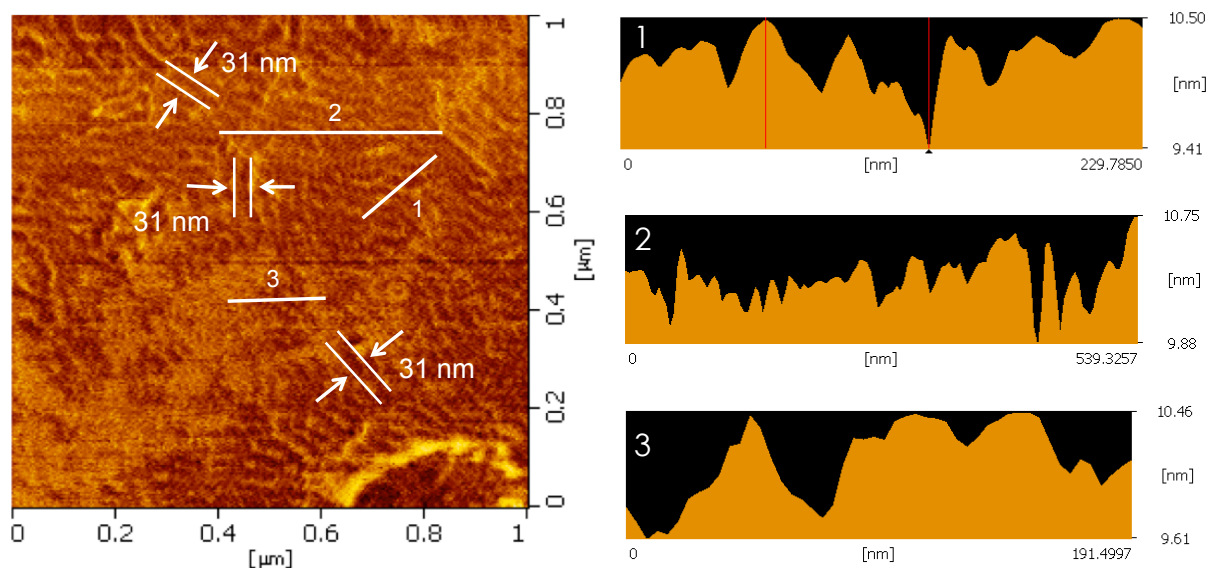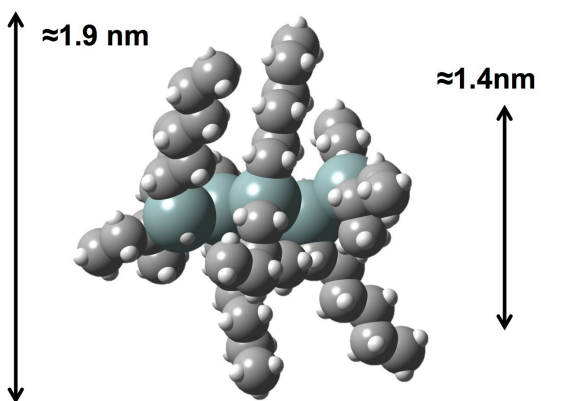

***n*-hexyl groups: stretch out *all-trans***

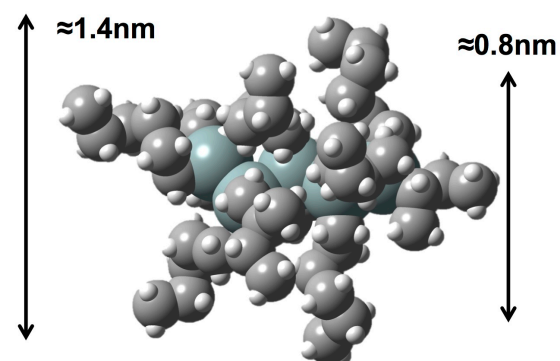

***n*-hexyl groups: shrink *all-gauche***

**PSi-S from  $10^{-5}$  M  $\text{CHCl}_3$  solution**

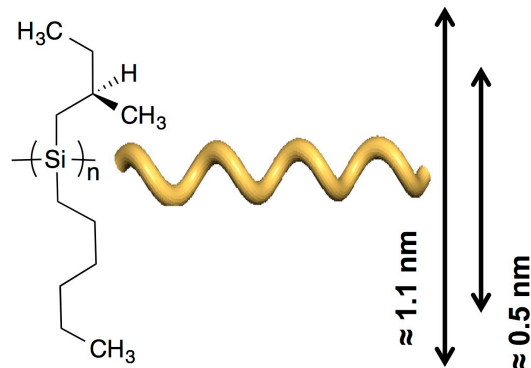

**Fig. S19.** (Top) DFM AFM image and height profile with SI-DF20S (coated with Al,  $f = 129$  KHz,  $R = 2\text{--}5$  nm,  $D = 12.5$   $\mu\text{m}$ ,  $C = 12$  N m<sup>-1</sup>) on HOPG casting from  $1 \times 10^{-5}$  M chloroform solution of **PSi-S** ( $M_n = 75,800$ ). (Bottom) Two representative models of *n*-hexyl structures with stretch out (*all-trans*) and shrink (*all-gauche*) forms.

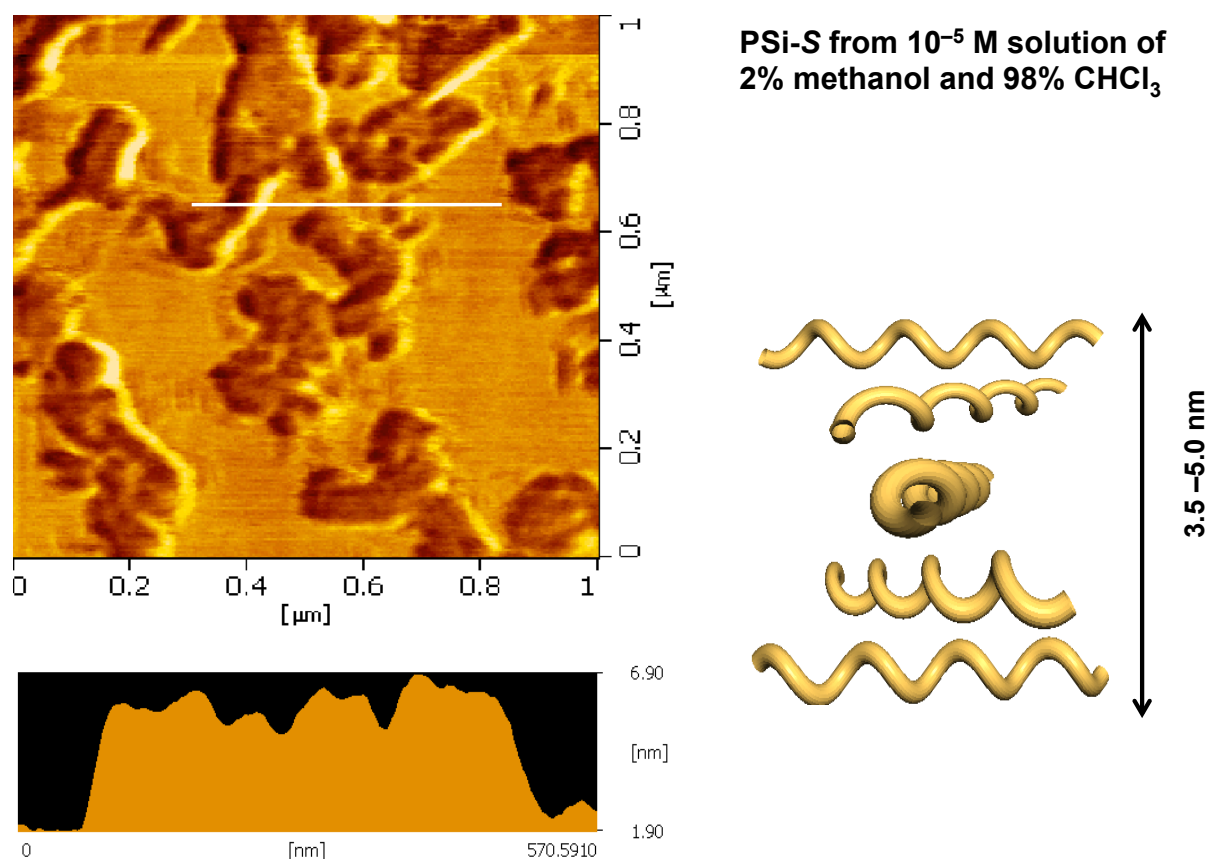

**Fig. S20.** (Left) DFM AFM image and height profile with SI-DF20S (coated with Al,  $f = 129$  KHz,  $R = 2\text{--}5$  nm,  $D = 12.5$   $\mu\text{m}$ ,  $C = 12$  N m $^{-1}$ ) on HOPG casting from  $1 \times 10^{-5}$  M in 2% methanol and 98 % chloroform solution of **PSi-S** ( $M_n = 75,800$ ). (Right) Schematic model of  $7_3$ -helical **PSi-S** aggregate on HOPG.

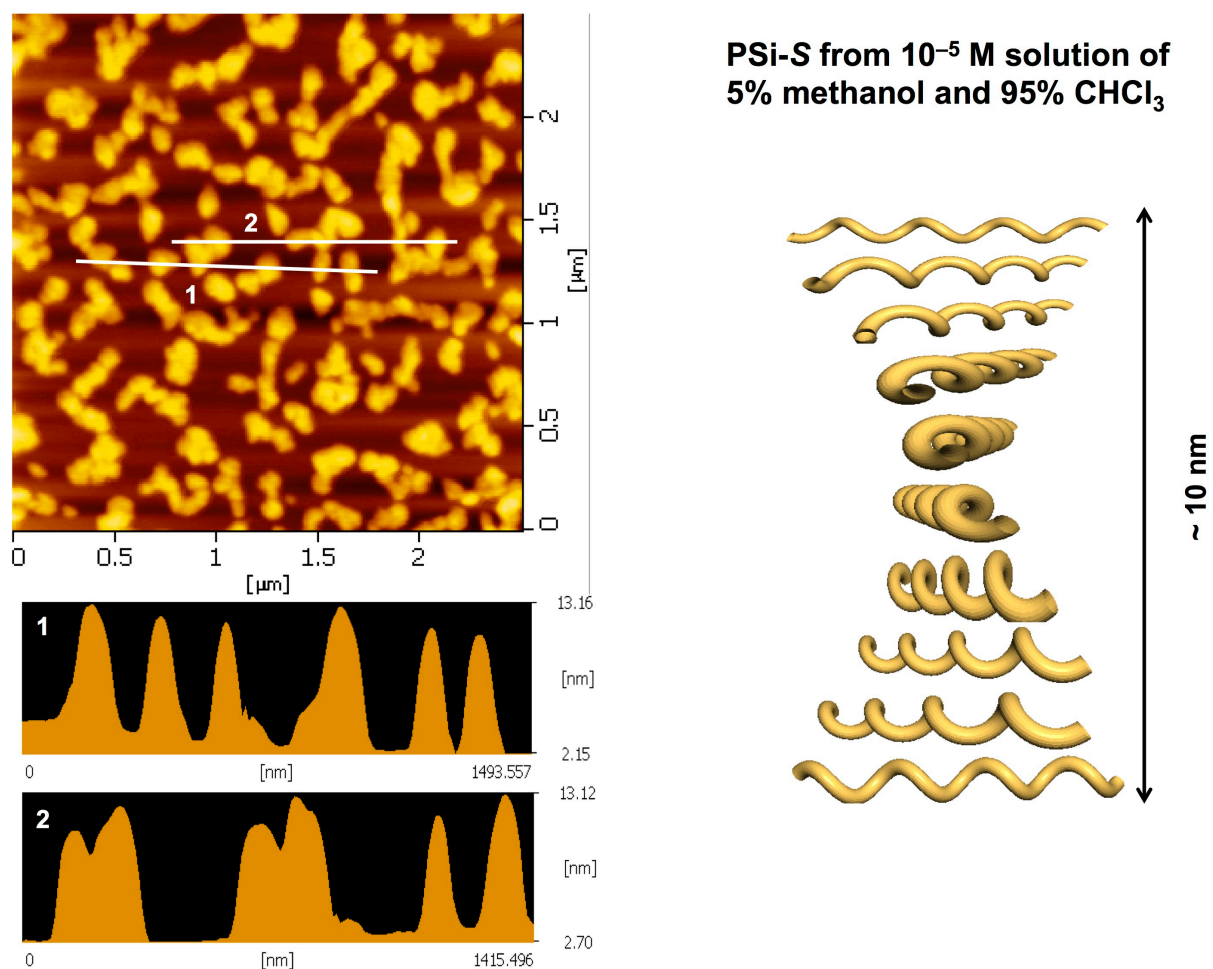

**Fig. S21.** (Left) DFM AFM image and height profile with SI-DF20S (coated with Al,  $f = 129$  KHz,  $R = 2\text{--}5$  nm,  $D = 12.5$   $\mu\text{m}$ ,  $C = 12$   $\text{Nm}^{-1}$ ) on HOPG casting from 5% methanol and 95 % chloroform solution ( $1 \times 10^{-5}$  M) of **PSi-S** ( $M_n = 75,800$ ). (Right) A schematic model of  $7_3$ -helical **PSi-S** aggregate on HOPG.



PSi-S from  $10^{-5}$  M solution of 5% methanol and 95%  $\text{CHCl}_3$

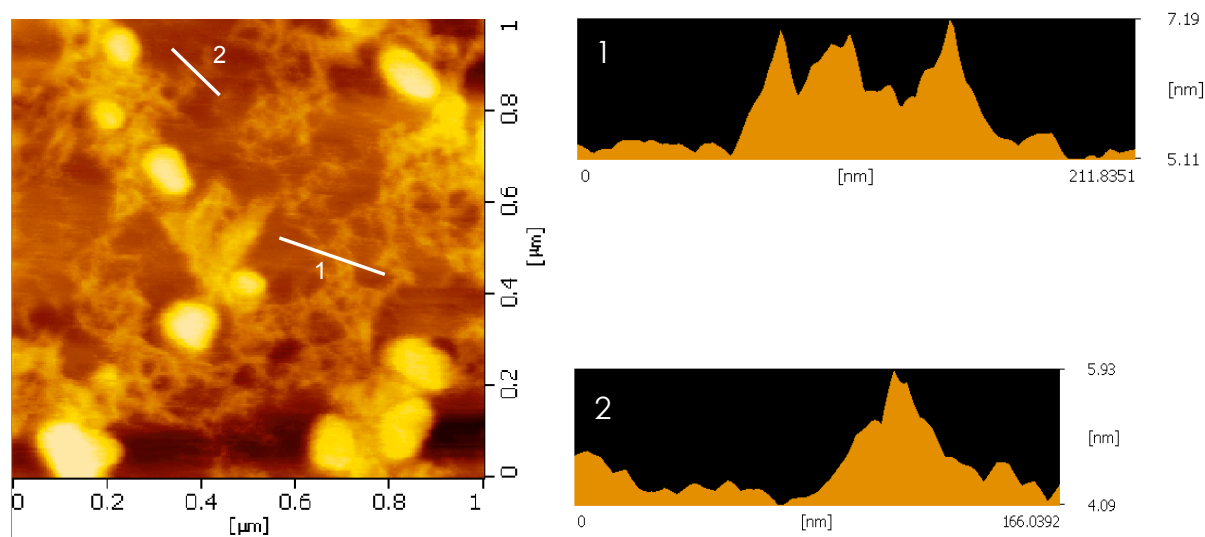

PF8 from  $\text{CHCl}_3$  ( $5 \times 10^{-6}$  M)

$M_n = 78,400$   $DP_n = 212$

End-to-end distance of an ideal rod  $\approx 169$  nm

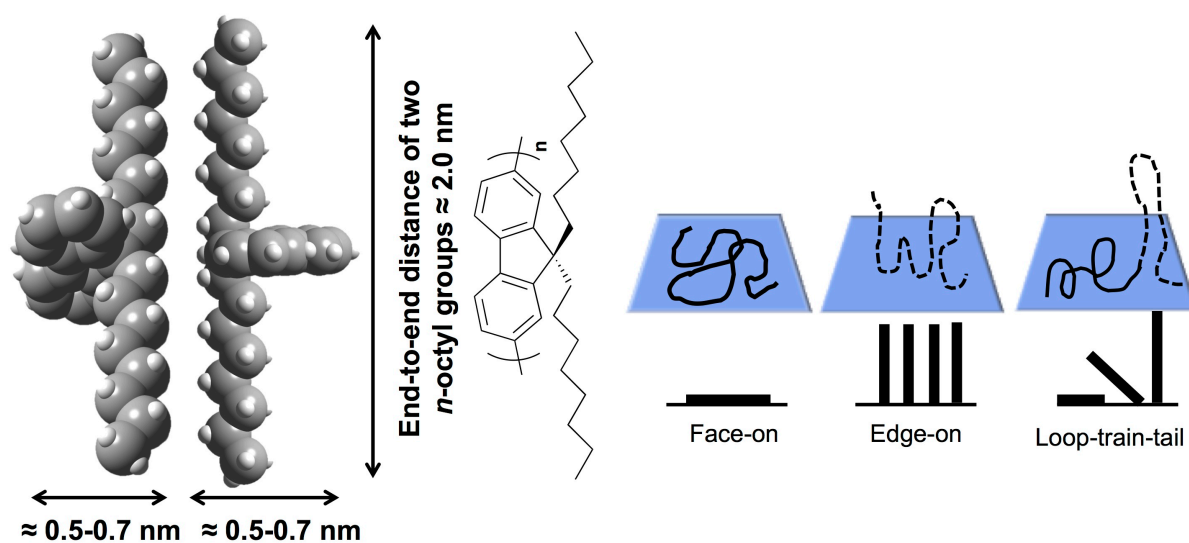

**Fig. S22.** (Top) DFM AFM image and height profiles with SI-DF20S (coated with Al,  $f = 129$  KHz,  $R = 2-5$  nm,  $D = 12.5$   $\mu\text{m}$ ,  $C = 12$  N  $\text{m}^{-1}$ ) on HOPG casting from  $5 \times 10^{-6}$  M chloroform solution of **PF8** ( $M_n = 78,400$ ). (Bottom) A representative model of two *n*-octyl groups with stretch out form and several orientations of **PF8** at HOPG.

From **PSi-S** ( $1 \times 10^{-5}$  M) and **PF8** ( $0.5 \times 10^{-5}$  M) solution of 5% methanol and 95%  $\text{CHCl}_3$

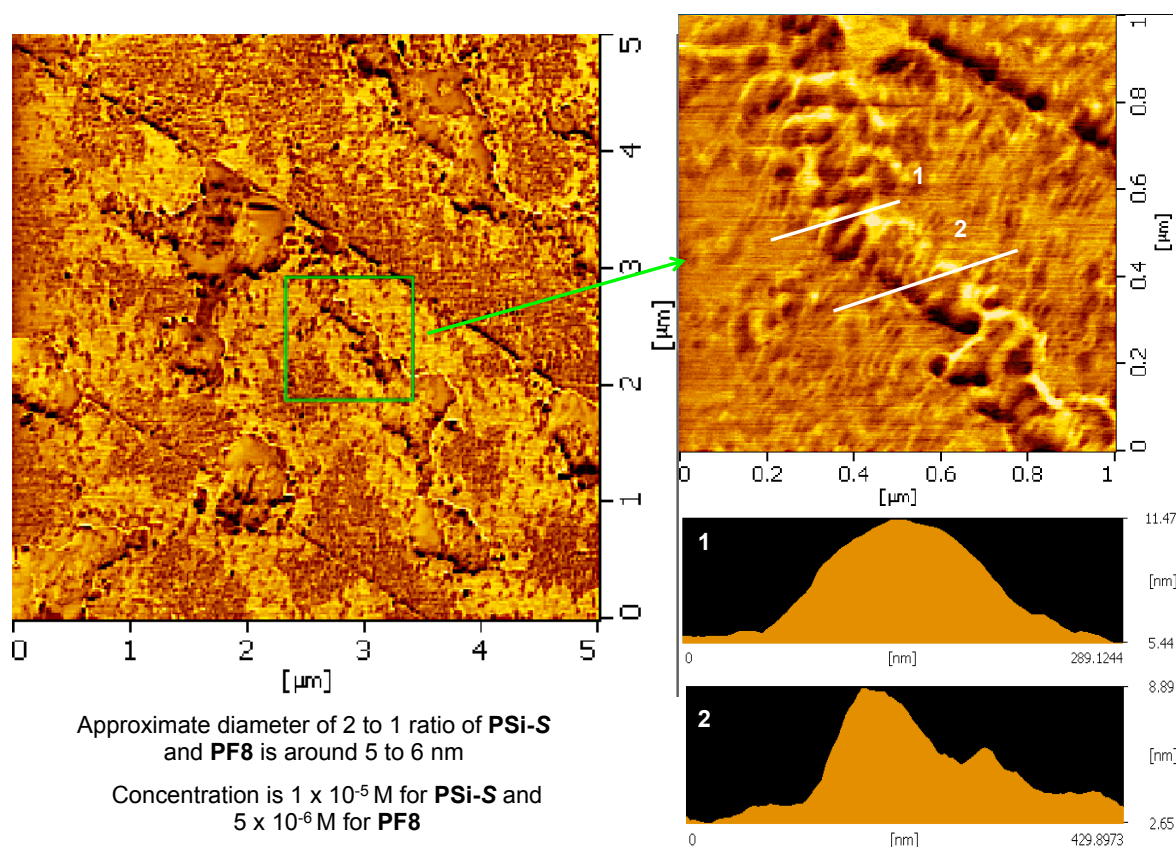

**Fig. S23.** DFM AFM images and height profiles with SI-DF20S (coated with Al,  $f = 129$  KHz,  $R = 2-5$  nm,  $D = 12.5$   $\mu\text{m}$ ,  $C = 12$   $\text{N m}^{-1}$ ) on HOPG casting from **PF8** ( $0.5 \times 10^{-5}$  M) and **PSi-S** ( $1.0 \times 10^{-5}$  M) (2:1 ratio) from solution of 5% methanol and 95%  $\text{CHCl}_3$ .



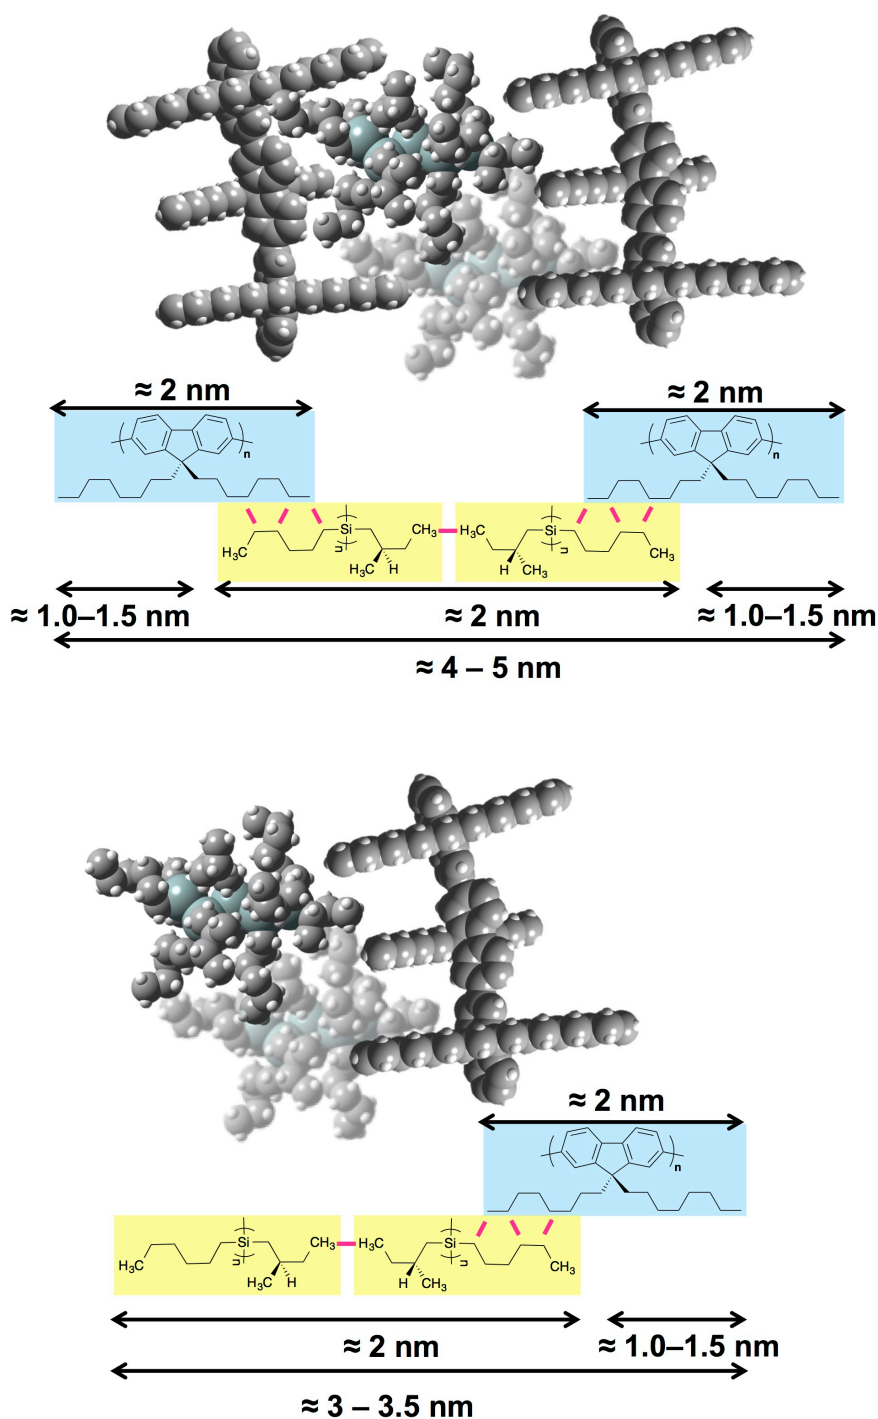

**Fig. S24.** Speculated cross-section and computer generated models of **PSi-S-PF8** (= 2:1 ratio) hetero-aggregate to explain height profile (diameter of the aggregate) in Fig. S23. Red lines are possible attractive C-H/H-C interactions, causing an interdigitation between several alkyl side chains of **PSi-S** and **PF8**. (Top) Height of  $\approx 6$  nm arises from two helical **PSi-S** chains with shrink *n*-hexyl groups and two **PF8** chains with stretch-out *n*-octyl groups. (Bottom) Height of  $\approx 5$  nm comes from two **PSi-S** chains with shrink *n*-hexyl groups and one **PF8** chain with stretch-out *n*-octyl groups.

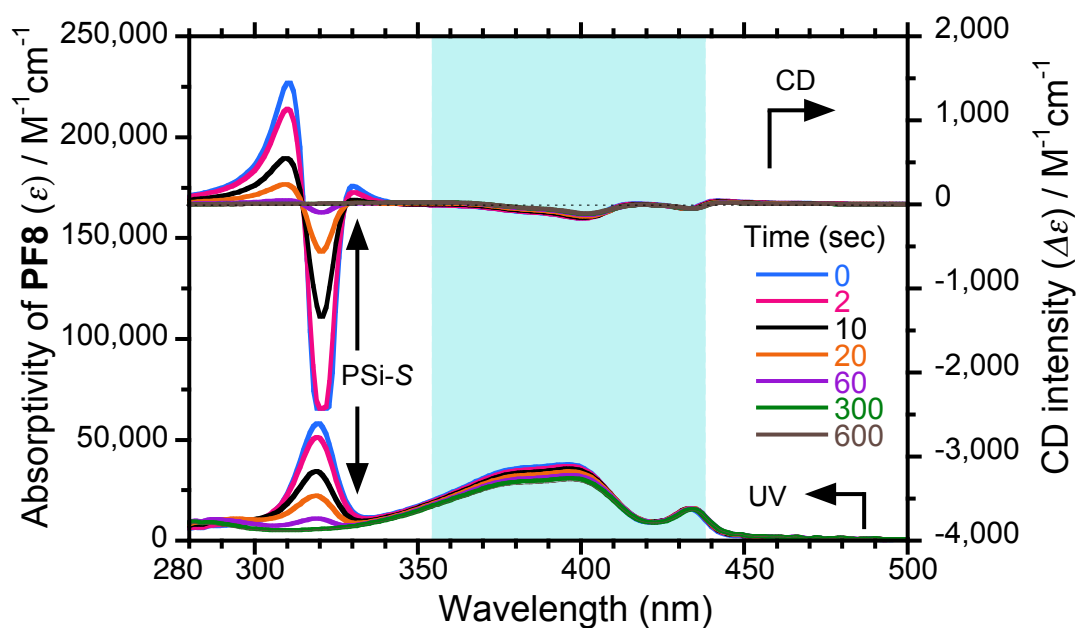

**Fig. S25.** CD and UV-Vis spectra of hetero-aggregates under photochemical decomposition of **PSi-S** and **PF8** with a 2-to-1 ratio produced in a toluene-methanol cosolvent (1.5/1.5 (v/v)) with  $[\text{PF8}] = 2.5 \times 10^{-5} \text{ M}$  and  $[\text{PSi-S}] = 5.0 \times 10^{-5} \text{ M}$  as their repeating units. The  $M_w$  values of **PSi-S** and **PF8** were 40,500 and 78,400, respectively.

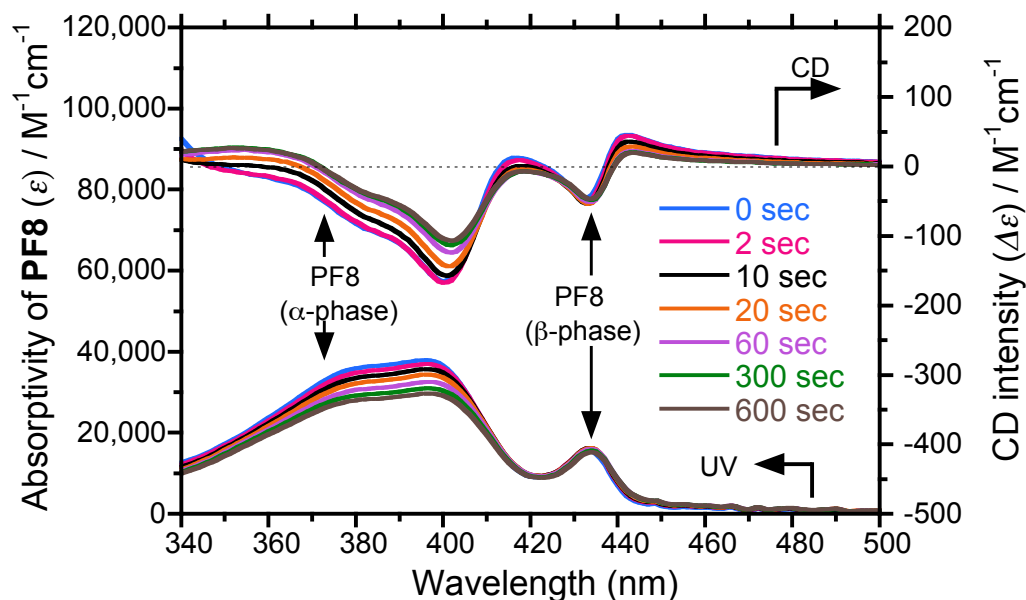

**Fig. S26.** CD and UV-Vis spectra of hetero-aggregates under photochemical decomposition of **PSi-S** and **PF8** (enlarge) with a 2-to-1 ratio produced in a toluene-methanol cosolvent (1.5/1.5 (v/v)) with  $[\text{PF8}] = 2.5 \times 10^{-5} \text{ M}$  and  $[\text{PSi-S}] = 5.0 \times 10^{-5} \text{ M}$  as their repeating units. The  $M_w$  values of **PSi-S** and **PF8** were 40,500 and 78,400, respectively.

### 3. References

S1) a) M. Fujiki, *Jpn. Kokai Tokkyo Koho*, 1993, JP 05-202528; b) M. Fujiki, *J. Am. Chem. Soc.*, 1994, **116**, 6017; c) M. Fujiki, *Appl. Phys. Lett.*, 1994, **65**, 3251; d) Y. Nakano, F. Ichiyanagi, M. Naito, Y. Yang and M. Fujiki, *Chem. Commun.*, 2012, **48**, 6636; e) M. Fujiki, *Symmetry*, 2010, **2**, 1625.
